# Supplementary material for: Localization of the Catalytic Domain of Copepod Luciferases: Analysis of Truncated Mutants of the Metridia longa Luciferase
Source: MDPI journal article supplement (doi:10.3390/life13051222), 2023-05-21
Supplement: s1 [file s1]

Electronic Supplementary Information for

**Localization of the catalytic domain of copepod luciferases:**

**Analysis of truncated mutants of the *Metridia longa* luciferase**

Svetlana V. Markova<sup>1,2</sup>, Marina D. Larionova<sup>1</sup>, Igor A. Korotov<sup>1</sup>, and Eugene S. Vysotski<sup>1\*</sup>

*<sup>1</sup>Photobiology Laboratory, Institute of Biophysics SB RAS, Federal Research Center “Krasnoyarsk Science Center SB RAS”, Krasnoyarsk, Russia*

*<sup>2</sup>School of Fundamental Biology and Biotechnology, Siberian Federal University, Krasnoyarsk, Russia*

\*Author for correspondence: Eugene S. Vysotski; e-mail <eugene\_vysotski@ibp.ru>;

tel. 7 (391) 249-44-30; fax 7 (391) 290-54-90

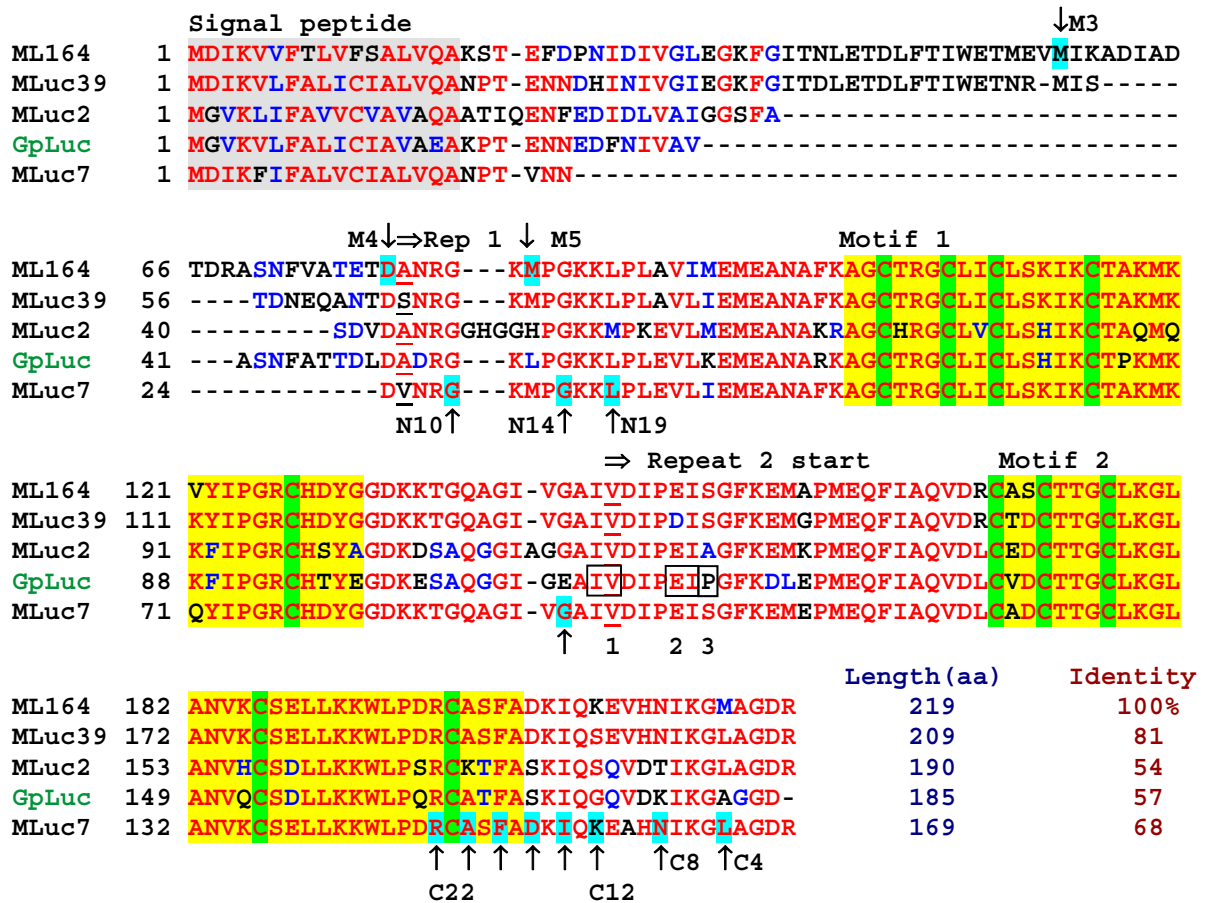

**Figure S1.** Multiple protein alignment for representatives of four paralogous groups of the *Metridia longa* luciferase isoforms: MLuc164 (AAR17541), MLuc39 (ABW06650), MLuc7 (AJC98141), and MLuc2 (APQ47583), and for the *Gaussia princeps* luciferase GpLuc (AAG54095). The alignment was produced by ClustalW and adjusted manually using nucleotide sequence data. The identical amino acid residues are marked in red; the similar amino acid residues – in blue. The predicted signal peptides providing secretion of the luciferases are shown with a gray box. The start of two non-identical tandem repeats in luciferases' sequences is indicated by horizontal arrow. The most similar motifs within non-identical repeats are marked by yellow, conservative Cys residues are highlighted in green. Bottom vertical arrows and cyan boxes mark the boundaries of the MLuc7 deletion mutants obtained in this work. Start points of the N-terminus truncated mutants of MLuc164 luciferase isoform revealing a high activity [1] are labeled as M3, M4, and M5 with top vertical arrows and cyan boxes. The sites dividing the *Gaussia* luciferase into specific fragments are framed: 1 – the fragments' edges for protein complementation assay (PCA) [2], 2 – the end-point of GpLuc fragment corresponded to the first repeat with declared bioluminescent activity [3], 3 – the end of the first half of GpLuc with declared high activity [4].

Predicted signal peptides in 17-22 aa

|            |   |       |                                                                                                                                                |                                                                       |            |
|------------|---|-------|------------------------------------------------------------------------------------------------------------------------------------------------|-----------------------------------------------------------------------|------------|
| LoLuc1-3   | 1 | ----  | <b>MISW</b> -- <b>NLF</b> AFAT <b>I</b> AL <b>SQA</b> LPA-----                                                                                 | <b>SPTDRSIV</b> LDNGYV-----                                           | CSWEGIP    |
| PsLuc2     | 1 | ----  | <b>MSI</b> -- <b>QFLY</b> AL <b>VCLA</b> AAGCQ <b>SQ</b> KLLP <b>SEDP</b> EQY <b>NIAD</b> DDL <b>VAKLSIT</b> DD <b>EMET</b> Y <b>TYT</b> WE--- |                                                                       |            |
| PsLuc1     | 1 | ----  | <b>MYI</b> -- <b>KVLF</b> GL <b>TCL</b> SL <b>VLA</b> QPT-----                                                                                 | <b>ENKKE</b> SY <b>TED</b> TD-----                                    |            |
| PaLuc1     | 1 | ----  | <b>MYI</b> -- <b>TVLL</b> GL <b>TCL</b> SL <b>VLA</b> QPT-----                                                                                 | <b>ENKQESQ</b> IED <b>IDR</b> STSLG-----                              | LMCYEQCTGQ |
| PxLuc1-7   | 1 | ----  | <b>MYI</b> -- <b>KVLL</b> GL <b>TCL</b> SL <b>VLA</b> QPT-----                                                                                 | <b>ENKRES</b> DI <b>EDIDR</b> STSLG-----                              | LMCYQQCTGQ |
| PxLuc1-8   | 1 | ----  | <b>MYI</b> -- <b>KVWF</b> GL <b>ACL</b> SL <b>VLA</b> QPT-----                                                                                 | <b>ENKQESH</b> IVDS-----                                              |            |
| MLuc164    | 1 | ----  | <b>MDI</b> -- <b>KVVF</b> TL <b>VFS</b> AL <b>VQA</b> KST----                                                                                  | <b>EFDPNIDIV</b> GLE <b>GKFGI</b> -TNLE <b>TDL</b> --FTIW <b>ETME</b> |            |
| MLuc39     | 1 | ----  | <b>MDI</b> -- <b>KVLF</b> AL <b>ICIAL</b> V <b>QAN</b> PT-----                                                                                 | <b>ENNDHINIV</b> GIE <b>GKFGI</b> -TDLE <b>TDL</b> --FTIW <b>ETNR</b> |            |
| MoLuc1     | 1 | MPRGN | <b>MDI</b> -- <b>KVLF</b> AL <b>TCF</b> AL <b>VQ</b> SNPT-----                                                                                 | <b>ETQDGV</b> DIL <b>GVEGKFGT</b> ETNLE <b>TDL</b> --FTIW <b>EING</b> |            |
| MpLuc1     | 1 | ---   | <b>MMEI</b> -- <b>KVLF</b> AL <b>ICF</b> AL <b>VQ</b> ANPT-----                                                                                | <b>ENKDDIDIV</b> G <b>VEGKFGT</b> -TDLE <b>TDL</b> --FTIW <b>EDMN</b> |            |
| MlLuc-g7   | 0 | ----- |                                                                                                                                                |                                                                       |            |
| MLuc7      | 1 | ----  | <b>MDI</b> -- <b>KFIF</b> AL <b>VCIAL</b> V <b>QAN</b> PT-----                                                                                 | <b>VNN</b> -----                                                      |            |
| MaLuc1     | 1 | ----  | <b>MDI</b> -- <b>KVLF</b> AL <b>ICVAM</b> V <b>QAK</b> AT-----                                                                                 | <b>ENND</b> DI <b>DIVGI</b> AST <b>FI</b> -----                       |            |
| McLuc1     | 1 | ----  | <b>MDI</b> -- <b>KVLF</b> AL <b>ICVAL</b> V <b>QAK</b> PT-----                                                                                 | <b>ENND</b> DI <b>DIVGI</b> AST <b>FI</b> -----                       |            |
| GpLuc      | 1 | ----  | <b>MGV</b> -- <b>KVLF</b> AL <b>ICIA</b> V <b>AEAK</b> PT-----                                                                                 | <b>ENNEDFNIV</b> AVAS <b>NFA</b> -----                                |            |
| MaLuc2     | 1 | ----  | <b>MGV</b> -- <b>KLIF</b> AV <b>LCVAV</b> A <b>QA</b> ATI----                                                                                  | <b>NENFEGIDL</b> V <b>AI</b> GG <b>SFGP</b> -----                     |            |
| McLuc2     | 1 | ----  | <b>MGV</b> -- <b>KLIF</b> AV <b>LCVAV</b> A <b>QA</b> ATI----                                                                                  | <b>NENFEGIDL</b> V <b>AI</b> GG <b>SFGP</b> -----                     |            |
| MLuc2      | 1 | ----  | <b>MGV</b> -- <b>KLIF</b> AV <b>VCVAV</b> A <b>QA</b> ATI----                                                                                  | <b>QENFEDIDL</b> V <b>AI</b> GG <b>SFA</b> -----                      |            |
| MoLuc2     | 1 | ----  | <b>MGV</b> -- <b>KLIF</b> AV <b>LCVAV</b> A <b>QA</b> ATI----                                                                                  | <b>NENFEDIDL</b> V <b>AI</b> GG <b>SFA</b> -----                      |            |
| MlLuc-g1   | 0 | ----- |                                                                                                                                                |                                                                       |            |
| MpLuc2     | 1 | ----  | <b>MGV</b> -- <b>KLIF</b> AV <b>VCVAA</b> A <b>QA</b> ATI----                                                                                  | <b>NENFEDIDL</b> V <b>AI</b> GG <b>SFA</b> -----                      |            |
| PaLuc2     | 1 | ----  | <b>MAL</b> -- <b>KFLV</b> AV <b>ICLAA</b> V <b>QAK</b> SI----                                                                                  | <b>DSYENIDIV</b> AVAG <b>NFAA</b> -----                               |            |
| PxLuc2     | 1 | ----- |                                                                                                                                                |                                                                       |            |
| HmLuc1     | 1 | ----  | <b>MVRL</b> PIL <b>VVIS</b> LA <b>SLYII</b> QAWAA-----                                                                                         | <b>TDEEELDL</b> FDRVK-----                                            | NYWAIGV    |
| HmLuc2     | 1 | ----  | <b>MFR</b> L <b>PILVVIS</b> LA <b>SLYII</b> QAWAA-----                                                                                         | <b>TDEEELDL</b> FDRVK-----                                            | NYWGIGV    |
| HtLuc2     | 1 | ----  | <b>MWRL</b> LS <b>LMLL</b> AV <b>TSVY-IQ</b> VWAA-----                                                                                         | <b>SEEADDDL</b> V <b>SLVK</b> -----                                   | NYWGVGV    |
| HtLuc1-1-2 | 1 | ----  | <b>MWH</b> LS <b>LMLL</b> AV <b>TSVY-MA</b> AL-----                                                                                            | <b>EEADDDL</b> VE-----                                                | NYWRIGV    |
| HtLuc1-2-2 | 1 | ----  | <b>MWH</b> LS <b>LMLL</b> AV <b>TSVY-IQ</b> VVAA-----                                                                                          | <b>SEEAD</b> D <b>HVSLVK</b> -----                                    | NYWRIGV    |

|            |    | ↓ Start of repeat 1                                                                                                          | Motif 1 |
|------------|----|------------------------------------------------------------------------------------------------------------------------------|---------|
| LoLuc1-3   | 43 | D-----DLRDCPKTE <b>DMSKQHG</b> --AAL <b>KLPDPVLD</b> EMECNA <b>KKSGCVRGCLQCLALI</b>                                          |         |
| PsLuc2     | 58 | -----ELLIISQDFANNLN <b>VDGDRD</b> --R <b>KLP</b> GKKLP <b>LEV</b> LK <b>IMEANARRAGCTRGCLICLSKI</b>                           |         |
| PsLuc1     | 33 | -----VNGD <b>HDRG</b> --R <b>KLP</b> GKKLP <b>LEV</b> LK <b>IMEANARRAGCTRGCLICLSKI</b>                                       |         |
| PaLuc1     | 49 | SGLDLKCYKECADF-----TGDR <b>NRG</b> --R <b>KLP</b> GKKLP <b>LEV</b> LK <b>IMEANARRAGCTRGCLICLSKI</b>                          |         |
| PxLuc1-7   | 49 | SGLDLTCYKQCTDV---SGVR <b>DYNRG</b> --K <b>KLP</b> GKKLP <b>LEV</b> LK <b>IMEANARRAGCTRGCLICLSKI</b>                          |         |
| PxLuc1-8   | 33 | -----LD <b>GDRG</b> --R <b>KLP</b> GKKLP <b>LEV</b> LK <b>IMEANARRAGCTRGCLICLSKI</b>                                         |         |
|            |    | ↓M3                      ↓M4                      ↓M5                                                                        |         |
| MLuc164    | 53 | V <b>MI</b> KADIADTD <b>RAS</b> NFVAT <b>ETDANRG</b> --K <b>MP</b> GKKLP <b>LA</b> V <b>IME</b> EANAF <b>KAGCTRGCLICLSKI</b> |         |
| MLuc39     | 52 | -MIST-----DNEQANT <b>DSNRG</b> --K <b>MP</b> GKKLP <b>LA</b> V <b>IME</b> EANAF <b>KAGCTRGCLICLSKI</b>                       |         |
| MoLuc1     | 59 | -I <b>IK</b> SD-----RDTNRANT <b>DADRG</b> --K <b>MP</b> GKKLP <b>LA</b> V <b>IME</b> EANAF <b>KAGCTRGCLICLSKI</b>            |         |
| MpLuc1     | 54 | -VIS-----RDTNLVNS <b>DADRG</b> --K <b>MP</b> GKKLP <b>LEV</b> L <b>IME</b> EAN <b>ARKAGCTRGCLICLSKI</b>                      |         |
| MlLuc-g7   | 01 | -----P <b>LEV</b> L <b>IME</b> EAN <b>ARKAGCTRGCLICLSKI</b>                                                                  |         |
|            |    | ↓N10      ↓N14                                                                                                               |         |
| MLuc7      | 24 | -----D <b>VNRG</b> --K <b>MP</b> G <b>KKLP</b> LEV <b>LIME</b> EANAF <b>KAGCTRGCLICLSKI</b>                                  |         |
|            |    | ↑N19                                                                                                                         |         |
| MaLuc1     | 37 | -----TTNT <b>DADRG</b> --K <b>MP</b> G <b>KRL</b> PLAVLK <b>EME</b> ANAV <b>KAGCSRGCLICLSKI</b>                              |         |
| McLuc1     | 37 | -----TTNT <b>DADRG</b> --K <b>MP</b> GKKLP <b>LA</b> V <b>IME</b> EAN <b>AAKAGCSRGCLICLSKI</b>                               |         |
| GpLuc      | 37 | -----TT <b>DL</b> <b>DADRG</b> --K <b>LP</b> GKKLP <b>LEV</b> LK <b>EME</b> AN <b>ARKAGCTRGCLICLSHI</b>                      |         |
| MaLuc2     | 39 | -----TD <b>VDAN</b> RGGHG <b>EMP</b> G <b>QKL</b> PLAVLK <b>EME</b> ANAV <b>RAGCHRGCLICLSHI</b>                              |         |
| McLuc2     | 39 | -----TD <b>VDAN</b> RGGHG <b>EMP</b> G <b>QKL</b> PLAVLK <b>EME</b> ANAV <b>RAGCHRGCLICLSHI</b>                              |         |
| MLuc2      | 38 | -----SD <b>VDAN</b> RGGHG <b>HPG</b> KK <b>MPKEV</b> L <b>EME</b> EAN <b>AKRAGCHRGCLVCLSHI</b>                               |         |
| MoLuc2     | 38 | -----TD <b>VDAN</b> RGGHG <b>HPG</b> KK <b>MPKEV</b> LL <b>EME</b> EAN <b>AKRAGCHRGCLICLSHI</b>                              |         |
| MlLuc-g1   | 1  | -----HG <b>GH</b> PG <b>KKMPKEV</b> LL <b>EME</b> EAN <b>AKRAGCHRGCLICLSHI</b>                                               |         |
| MpLuc2     | 38 | -----LD <b>VDAN</b> RGGHG <b>HPG</b> KK <b>MPKEV</b> L <b>EME</b> EAN <b>AKRAGCHRGCLICLSHI</b>                               |         |
| PaLuc2     | 38 | -----VD <b>QDAN</b> RG <b>G</b> --N <b>LP</b> G <b>KKMP</b> IEVLK <b>EME</b> EAN <b>AKRAGCVRGCLICLSHI</b>                    |         |
| PxLuc2     | 1  | -----G <b>CTRGCLICLSHV</b>                                                                                                   |         |
| HmLuc1     | 44 | -----ANDY <b>DGAV</b> SL <b>DR</b> --K <b>AKLP</b> --K <b>KL</b> SKAV <b>MMEME</b> AN <b>AKEAGCQKSCLICMSKV</b>               |         |
| HmLuc2     | 44 | -----ANDY <b>DGT</b> VSL <b>DR</b> --K <b>GKLP</b> --K <b>KL</b> SKAV <b>LIME</b> EAN <b>AQAGCQRQCLIGLSKI</b>                |         |
| HtLuc2     | 43 | -----SNER <b>DV</b> SL <b>DRG</b> GH <b>GKLP</b> --K <b>KL</b> S <b>VE</b> IL <b>AEME</b> EAN <b>AQSNCSRGCLIGLSKI</b>        |         |
| HtLuc1-1-2 | 37 | -----GNER <b>DV</b> SL <b>DRG</b> G <b>PP</b> -----K <b>LTKEL</b> LA <b>EMHAI</b> AVN <b>AGCSRVCLIGLSKI</b>                  |         |
| HtLuc1-2-2 | 43 | -----GNER <b>DV</b> SL <b>DRG</b> G <b>PP</b> -----K <b>LSKE</b> LL <b>AEMHAI</b> ASN <b>AGCSRVCLIGLSKI</b>                  |         |

|            |     |                                                                                                                                                     | ↓Start of repeat2 | Motif 2 |
|------------|-----|-----------------------------------------------------------------------------------------------------------------------------------------------------|-------------------|---------|
| LoLuc1-3   | 93  | KCTAKM <b>R</b> KYIPGRCHSYEGDKDIAQGGIGKELTID <b>I</b> DIPEIPGFLDLAPMDQFVAQVDLCVD <b>C</b> SSR <b>C</b> LK                                           |                   |         |
| PsLuc2     | 115 | KCTAKMKKFIPGRCHTYEGDKSIGGGIGAA- <b>I</b> IDIPEIPGFK <b>E</b> LEPMEQFIAQVDLCADCTT <b>R</b> CLK                                                       |                   |         |
| PsLuc1     | 77  | KCTAKMKQYIPGRCHTYEGDKSIGQAGIGGP- <b>I</b> IDIPEIIGFK <b>N</b> MEPMEQFIAQVDLCADCTT <b>G</b> CLK                                                      |                   |         |
| PaLuc1     | 106 | KCTAKMKQYIPGRCHTYEGDKSIGGGIGGP-IVDIPEIIGFQ <b>N</b> MEPMEQFIAQVDLCADCTT <b>G</b> CLK                                                                |                   |         |
| PxLuc1-7   | 108 | KCTAKMKRYIPGRCHTYEGDKSIGGGIGGP-IVDIPEIIGFK <b>N</b> MEPMDQFIAQVDLCADCTT <b>G</b> CLK                                                                |                   |         |
| PxLuc1-8   | 75  | KCTAKMKRYIPGRCHTYEGDKSIGGGIGGP-IVDIPEIIGFK <b>N</b> MEPMDQFIAQVDLCADCTT <b>G</b> CLK                                                                |                   |         |
| MLuc164    | 114 | KCTAKMKVYIPGRCHDYGGDKKTGQAGIVGA- <b>I</b> VDIPEISGFK <b>E</b> MAPMEQFIAQVDR <b>C</b> ASCTT <b>G</b> CLK                                             |                   |         |
| MLuc39     | 104 | KCTAKMKKYIPGRCHDYGGDKKTGQAGIVGA-IVDIP <b>D</b> ISGFK <b>E</b> MPMEQFIAQVDR <b>C</b> TDCTT <b>G</b> CLK                                              |                   |         |
| MoLuc1     | 112 | KCTAKMK <b>E</b> YIPGRCHDYGGDKKTGQAGIVGA-IVDIPEISGFK <b>E</b> LGPMEQFIAQVDLCADCTT <b>G</b> CLK                                                      |                   |         |
| MpLuc1     | 105 | KCTAKMKVYIPGRCHDYGGDKKTGQAGIVGA-IVDIPEISGFK <b>E</b> LEPMEQFIAQVDLCADCTT <b>G</b> CLK                                                               |                   |         |
| MlLuc-g7   | 29  | KCTAKMKVYIPGRCHDYGGDKKTGQAGIVGA-IVDIPEISGFK <b>E</b> LGPMEQFIAQVDLCADCTT <b>G</b> CLK                                                               |                   |         |
| MLuc7      | 64  | KCTAKMKQYIPGRCHDYGGDKKTGQAGIVGA- <b>I</b> VDIPEISGFK <b>E</b> MEPMEQFIAQVDLCADCTT <b>G</b> CLK                                                      |                   |         |
| MaLuc1     | 81  | KCTAKMKQYIPGRCHDYGGDKKTGQAA <b>I</b> EGA-IDD <b>I</b> DIPEISGFK <b>E</b> MAPMEQFIAQVDLCADCTT <b>G</b> CLK                                           |                   |         |
| McLuc1     | 81  | KCTAKMKQFIPGRCHDYGGDKKTGQAALVGA-IFDIPEIFGFLD <b>M</b> EP <b>I</b> EQFIAQVDLCAGCTT <b>G</b> CLK                                                      |                   |         |
| GpLuc      | 81  | KCTPKMKKFIPGRCHTYEGDK <b>E</b> SAQGGIGEA-IVDIPEIPGFKD <b>L</b> EPMEQFIAQVDLCVDCTT <b>G</b> CLK                                                      |                   |         |
| MaLuc2     | 85  | KCTAKMKQFIPGRCHSYAGDKGSAQGGIDDAAIVDMPEIAGFKDLAPMDQFIAQVDLCEDCTT <b>G</b> CLK                                                                        |                   |         |
| McLuc2     | 85  | KCTAKMKKFIPGRCHSYAGDKGSAQGGIDDSATVDMPEIAGFKDLAPMDQFIAQVDLCCKDCTT <b>G</b> CLK                                                                       |                   |         |
| MLuc2      | 84  | KCTAQMQKFIPGRCHSYAGDKDSAQGGIAGGAIVDIPEIAGFK <b>E</b> MPMEQFIAQVDLCEDCTT <b>G</b> CLK                                                                |                   |         |
| MoLuc2     | 84  | KCTQKMKKFIPGRCHSYAGDKDSAQGGITEETVDMPEIAGFKD <b>L</b> EPMEQFIAQVDLCVDCTT <b>G</b> CLK                                                                |                   |         |
| MlLuc-g1   | 38  | KCTKKMKKFIPGRCHSYAGDKDSAQGGITEETVDMPEIPGFKD <b>K</b> EPMDQFIAQVDLCVDCTT <b>G</b> CLK                                                                |                   |         |
| MpLuc2     | 84  | KCTKKMKKFIPGRCHSYEGDKDSAQGGIGEE-IVDMPEIPGFKD <b>K</b> EPMDQFIAQVDLCVDCTT <b>G</b> CLK                                                               |                   |         |
| PaLuc2     | 82  | KCTAKMKKFIPGRCHSYHGDADTKQGA <b>L</b> EE--VVDMP <b>E</b> IPGFVDM <b>E</b> PMEQFIAQVDK <b>C</b> EDCTT <b>G</b> CLK                                    |                   |         |
| PxLuc2     | 14  | KCTAKMKKFIPGRCHSYEGDGD <b>T</b> AQGG <b>I</b> EL--VVDMP <b>D</b> IPEFQ <b>E</b> MEPMEQFIAQVDK <b>C</b> EDCTT <b>G</b> CLK                           |                   |         |
| HmLuc1     | 92  | KCTKKMKKWLPGRCHAFV--PATDVIP <b>L</b> EPAS----DIPGYAN <b>M</b> TAMQQFN <b>Q</b> VNE <b>C</b> -P <b>C</b> STR <b>C</b> LK                             |                   |         |
| HmLuc2     | 92  | KCTLKMKKWLPGRCHSYAGDPATGQGP <b>L</b> EPAS----DIPGYEN <b>M</b> TGMQQFN <b>A</b> QVNE <b>C</b> -P <b>C</b> STR <b>C</b> LK                            |                   |         |
| HtLuc2     | 91  | KCTPKMKKFLPGRCH <b>E</b> YS <b>G</b> DPK <b>T</b> GQGP <b>L</b> TAAA----VIPGYSD <b>L</b> TAMEQFK <b>L</b> QVDK <b>C</b> -D <b>C</b> STQ <b>C</b> LK |                   |         |
| HtLuc1-1-2 | 81  | KCTPKMMTFLPGR <b>K</b> T <b>F</b> SPNPATGGGPFAAAA----AIPGFSD <b>L</b> TAMEQYKAQVAQ <b>C</b> -D <b>C</b> SSK <b>C</b> LV                             |                   |         |
| HtLuc1-2-2 | 87  | KCTPKMKTFLPGR <b>N</b> T <b>F</b> APKPATG <b>D</b> GPFAAAA----AIPGFSD <b>L</b> TAMEQYKAQVAQ <b>C</b> -D <b>C</b> SNR <b>C</b> LV                    |                   |         |

|            |     |                                    |                                            |
|------------|-----|------------------------------------|--------------------------------------------|
| LoLuc1-3   | 160 | GLANVQISCKLYKWLPTRCIGFQA           | KIKKE-ADTVIGLEDALALGFDTIQACVAAGKCKDTVGRYS  |
| Psluc2     | 181 | GLANVRNDLLKKWLPDR                  | CAGFANKIQSE-VHNIKGLAGDR-----               |
| Psluc1     | 143 | GLANVRNDLLKKWLPDR                  | CAGFALKIQGE-VENIKGMAGDR-----               |
| Paluc1     | 172 | GLANVRNDLLKKWLPDR                  | CAGFANKIQSE-VDNIKGLAGDR-----               |
| Pxluc1-7   | 174 | GLANVRNDLLKKWLPDR                  | CAGFADKIQNE-VDSIKGMAGDR-----               |
| Pxluc1-8   | 141 | GLANVRNDLLKKWLPDR                  | CAGFADKIQNE-VDSIKGMAGDR-----               |
| MLuc164    | 180 | GLANVRSELLEKKWLPDR                 | CASFADKIQKE-VHNIKGMAGDR-----               |
| MLuc39     | 170 | GLANVRSELLEKKWLPDR                 | CASFADKIQSE-VHNIKGLAGDR-----               |
| Moluc1     | 178 | GLANVRSALEKKWLPDR                  | CASFADKIQSE-VHNIKGLAGDR-----               |
| Mpluc1     | 171 | GLANVRSALEKKWLPDR                  | CASFADKIQSE-VDNIKGLAGDR-----               |
| Mluc-g7    | 95  | GL-----                            | -----                                      |
|            |     | ↓c22                  ↓c12 ↓c8 ↓c4 |                                            |
| MLuc7      | 130 | GLANVRSELLEKKWLPDR                 | CASFADKIQKE-AHNIKGLAGDR-----<br>↑ ↑ ↑ ↑c14 |
| Maluc1     | 147 | GLANVRSELLEKKWLPKR                 | CTSFATKMQKE-IHNIKGMSGDR-----               |
| McLUC1     | 147 | GLANIRSELLEKKWLPKR                 | CTSFAYKMQKE-MHNIKGMAGDR-----               |
| GpLuc      | 147 | GLANVQSDELEKKWLPQR                 | CATFASKIQGQ-VDKIKGAGGD-----                |
| MaLuc2     | 152 | GLANVHSDELEKKWLPSCR                | KSFA TKIQQSQ-VDTIKGLAGER-----              |
| McLuc2     | 152 | GLANVHSDELEKKWLPSCR                | KSFA TKIQQSQ-VDTIKGLAGAR-----              |
| MLuc2      | 151 | GLANVHSDELEKKWLPSCR                | KTFA SKIQQSQ-VDTIKGLAGDR-----              |
| Moluc2     | 151 | GLANVHSDELEKKWLPSCR                | KTFA SKIQQSQ-VDTIKGLAGDR-----              |
| Mluc-g1    | 105 | GLANVHSDELEKKWLPSCR                | KTFA SKIQQSQ-VDTIKGLAGDR-----              |
| Mpluc2     | 150 | GLANVHSDELEKKWLPSCR                | KTFA SKIQQSQ-VDTIKGLAGDR-----              |
| PaLuc2     | 147 | GLANVHSDELEKKWLPQR                 | CSQFADKIQSE-VDTIKGLAGDR-----               |
| PxLuc2     | 79  | GLANIHSNDELEKKWLPQR                | CSQFADKIQSE-VDTIKGLGGDR-----               |
| HmLuc1     | 151 | GLANIRSKQLFDAMPGR                  | KSFRDQILKE-VHKIKGLNDITSACEAQKL-DKGK-----   |
| HmLuc2     | 153 | GLANVRSKQLFDALPTR                  | CRNFRVQIQKE-VHKIKGLNDITSACEAIQT-DKGK-----  |
| HtLuc2     | 152 | GLANVRSAALKAVLPTR                  | CSQFATQIQAE-VGTIKGKGKPTPIG-----            |
| HtLuc1-1-2 | 142 | GLANIRSAALKKALPAR                  | TTFKTNIQEGAVDSIKGYGRK-----                 |
| HtLuc1-2-2 | 148 | GLANIRSAALKAAALPQR                 | TTFATANIQEGEVDSIKGYGRK-----                |

**Figure S2.** Multiple sequence alignment of representatives of putative paralogous groups of all known copepod luciferases generated by ClustalW and manually corrected. Maximally different sequences were used for alignment. In case of several isoforms differing by 1-3 residues, only one consensus sequence was chosen for alignment. E.g., the isoform MLuc2 of *Metridia longa* was determined as a consensus sequence for the group of 8 isoforms [5]. For color designations in the alignment refer to Fig. S1. The end points for the truncated mutants MLuc7 are marked with blue boxes. Start points for the truncated MLuc164 mutants revealing high activity [1] are labeled as M3, M4, and M5. The copepod luciferases in alignment are indicated as: LoLuc1-3 (GenBank accession number BAN91831) from *Lucicutia ovaliformis*; PsLuc1 (BAN91827) and PsLuc2 (BAN91828) from *Pleuromamma scutallata*; PaLuc1 (BAL63034) and PaLuc2 (BAL63035) from *Pleuromamma*

*abdominalis*; PxLuc1-7 (BAN91829), PxLuc1-8 (BAN91832), and PxLuc2 (BAN91830) from *Pleuromamma xiphias*; MLuc164 (ML164 or MLuc, AAR17541), MLuc39 (ABW06650), MLuc7 (AJC98141), and MLuc2 (APQ47583) from *Metridia longa*; MoLuc1 (BAL63032) and MoLuc2 (AB519699) from *Metridia okhotensis*; MpLuc1 (BAG48249) and MpLuc2 (BAG48250) from *Metridia pacifica*; MaLuc1 (BAN91823) and MaLuc2 (BAN91824) from *Metridia asymmetrica*; McLuc1 (BAN91825) and McLuc2 (BAN91826) from *Metridia curticauda*; Mluc1-g7 (TRINITY\_DN40692\_c0\_g7\_i1) and Mluc2-g7 (TRINITY\_DN49928\_c1\_g1\_i16) from *Metridia luciens* [6]; GpLuc (AAG54095) from *Gaussia princeps*; HtLuc2 (BAL63040), HtLuc1-1-2 (BAL63037) and HtLuc1-2-2 (or HtLuc, BAL63039) from *Heterorhabdus tanneri*; HmLuc1 (BAL63041) and HmLuc2 (BAL63042) from *Heterostylites major*.

**Table S1.** Primers used to obtain MLuc7 deletion mutants by mutagenesis or by cloning of PCR fragments. Cloning sites in sequences are underlined: NdeI-XhoI for pET22b+ and KpnI-XhoI for pcDNA3m [**Error! Bookmark not defined.**] vectors.

| No.                                                                  | Construct             | Primers for MLuc7 deletion mutants                                                                           |
|----------------------------------------------------------------------|-----------------------|--------------------------------------------------------------------------------------------------------------|
| On the base of pET22b+-MLuc7 or -GpLuc for <i>E. coli</i> expression |                       |                                                                                                              |
| 1                                                                    | ML7-C4                | Forward T7pro primer and reverse 5'-<br>GATCTCGAGTCATTAAAGACCCTTGATGTTGTGC-3'                                |
| 2                                                                    | ML7-C8                | Forward T7pro and reverse 5'-<br>GAGCTCGAGTCATTAGTTGTGCGCTTCTTTTTGA-3'                                       |
| 3                                                                    | ML7-C12               | Forward T7pro and reverse 5'-<br>ATGCTCGAGTCATTATTTTTGAATTTTGTGTCAGCAA-3'                                    |
| 4                                                                    | ML7-C14               | 5'-AGTTTTGCTGACAAAATTTAATGACTCGAGCACCACCA-3' and<br>complementary reverse primer for mutagenesis             |
| 5                                                                    | ML7-C16               | Forward 5'-GTGCAAGTTTTGCTGACTAATGACTCGAGCACCAC-3'<br>and complementary reverse primer for mutagenesis        |
| 6                                                                    | ML7-C18               | 5'-GACAGATGTGCAAGTTTTTAATGACTCGAGCACCACCA-3'<br>and complementary reverse primer for mutagenesis             |
| 7                                                                    | ML7-C20               | Forward T7pro and reverse 5'-<br>AGTCTCGAGTCATTATGCACATCTGTCTGGCAG-3'                                        |
| 8                                                                    | ML7-C22               | Forward T7pro and reverse 5'-<br>AGTCTCGAGTCATTATCTGTCTGGCAGCCATTTC-3'                                       |
| 9                                                                    | ML7-R1                | Forward T7pro and reverse 5'-<br>AGTCTCGAGTCATTAAACCCACTATTCCAGCCTGT-3'                                      |
| 10                                                                   | ML7-R2                | Forward 5'-CAGTTCATATGGGTGCTATTGTTGACATTCC-3' and<br>reverse #L7: 5'-GATCTCGAGTCATTAAACGATCTCCAGCAAGAC-3'    |
| 11                                                                   | ML7-N10               | Forward 5'-CAGTGCAATATGGGTAAAATGCCTGGGAAAA-3 and<br>#L7 as reverse.                                          |
| 12                                                                   | ML7-N14               | Forward 5'-CAGTGCAATATGGGGAAGAAATTGCCACTGGA-3' and<br>#L7 as reverse.                                        |
| 13                                                                   | ML7-N19               | Forward 5'-CTCATCATATGCTGGAAGTACTTATAGAAATGG-3' –<br>and #L7 as reverse.                                     |
| 14                                                                   | GpLuc                 | Forward 5'-GACAACATATGAAACCAACTGAAAACAATG-3' and<br>reverse 5'-TTACTCGAGGTTAATCACCACCGGCACC-3'               |
| On the base of pcDNA3m-MLuc7 [7] for mammalian expression            |                       |                                                                                                              |
| 14                                                                   | pcDNA3m-<br>ML7-N10   | Forward 5'-TGCATTGGTCCAAGCCGGTAAAATGCCTGGGA-3' and<br>complementary reverse primer, template pcDNA3m-MLuc7   |
| 15                                                                   | pcDNA3m-<br>ML7-N10C4 | Template pcDNA3m-ML7-N10 [2], forward T7pro and reverse 5'-<br>GATCTCGAGTCATTAAAGACCCTTGATGTTGTGC-3' primers |



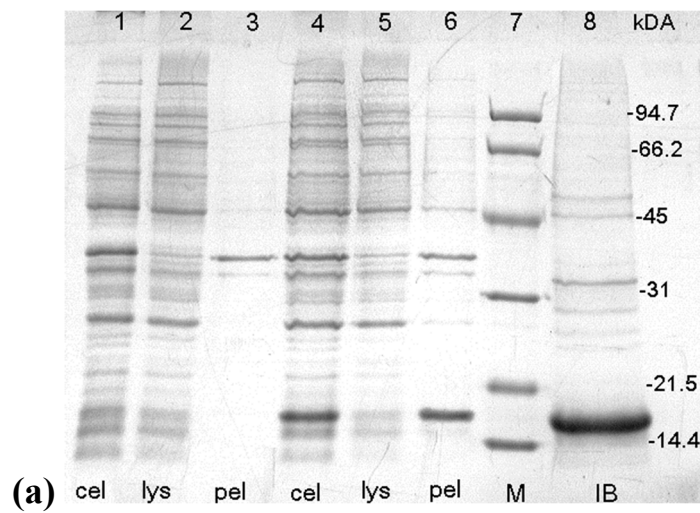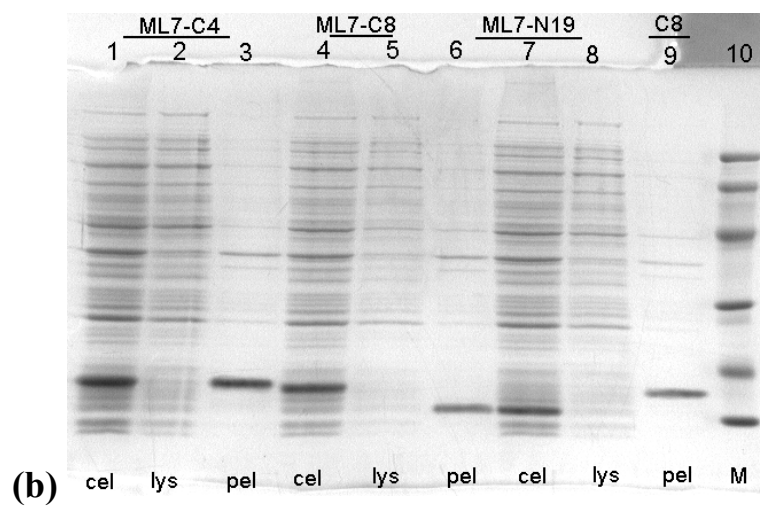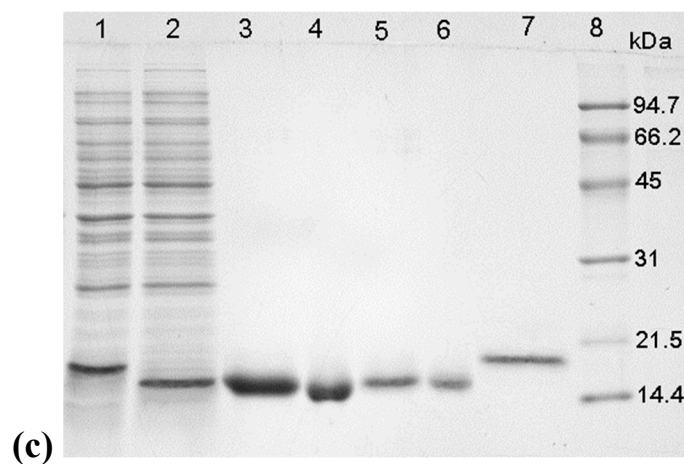

**Figure S3.** Denaturing SDS-PAGE analysis (12.5% acrylamide) of expression of MLuc7, some deletion mutants in *E. coli* cells and final high-purity preparations: (a) Samples of cell fractions. Lanes 1-3, control *E. coli* cells: 1, whole cells; 2, soluble fraction; 3, insoluble cell pellet. Lanes 4-8, MLuc7 expression: 4, whole cells; 5, soluble fraction; 6, insoluble cell pellet; 7, low range protein standards (Bio-Rad); 8, washed insoluble cell pellet (inclusion bodies) for preparative MLuc7

purification; **(b)** Samples of MLuc7 deletion mutant expression. Lanes 1-3, ML7-C4 expression: 1, whole cells; 2, soluble fraction; 3, insoluble cell pellet. Lanes 4-5, ML7-C8 expression; 4, whole cells; 5, soluble fraction. Lanes 6-8, ML7-N19 expression: 6, insoluble cell pellet; 7, whole cells; 8, soluble fraction. Lane 9: insoluble cell pellet with ML7-C8 synthesis. Lane 10: low range protein standards (Bio-Rad). Polyacrylamide gels were stained with Coomassie blue; **(c)** Lanes: 1, *E. coli* expressing MLuc7; 2, *E. coli* expressing ML7-N10; final luciferase preparations: 3, ML7-N10; 4, semi-native PAGE of non-denatured ML7-N10; 5, ML7-N10C4; 6, semi-native PAGE of non-denatured ML7-N10C4, 7, MLuc7; 8, low range protein standards (Bio-Rad). The sample for semi-native gel electrophoresis was prepared without reducing agents (DTT and  $\beta$ -mercaptoethanol) addition and heating.

**Coordinates data S1.** Predicted structural model for MLuc7wt. Prediction of the structure was carried out using the on-line server I-TASSER [8–10]. As a reference model, the structure of Gaussia luciferase (PDB ID 7D2O) was used. The file is attached to the supplementary files' archive as MLuc7wt.pdb.

**Coordinates data S2.** Structural model for ML7-N10 deletion mutant of MLuc7. Prediction of the structure was carried out using the on-line server I-TASSER [8–10]. As a reference model, the structure of Gaussia luciferase (PDB ID 7D2O) was used. The file is attached to the supplementary files' archive as ML7N10.pdb.

## References

1. Markova, S.V.; Burakova, L.P.; Vysotski, E.S. High-active truncated luciferase of copepod *Metridia longa*. *Biochem Biophys Res Commun* **2012**, *417*, 98-103. <https://doi.org/10.1016/j.bbrc.2011.11.063>.
2. Remy, I.; Michnick, S.W. A highly sensitive protein-protein interaction assay based on Gaussia luciferase. *Nat Methods*, **2006**, *3*, 977-979. <https://doi.org/10.1038/nmeth979>.
3. Inouye, S.; Sahara, Y. Identification of two catalytic domains in a luciferase secreted by the copepod *Gaussia princeps*. *Biochem Biophys Res Commun* **2008**, *365*, 96-101. <https://doi.org/10.1016/j.bbrc.2007.10.152>.
4. Hunt, E.A.; Moutslopoulou, A.; Ioannou, S.; Ahern, K.; Woodward, K.; Dikici, E.; Daunert, S.; Deo, S.K. Truncated variants of Gaussia luciferase with tyrosine linker for site-specific bioconjugate applications. *Sci Rep* **2016**, *8*, 26814. <https://doi.org/10.1038/srep26814>.

- 5 Larionova, M.D.; Markova, S.V.; Vysotski, E.S. The novel extremely psychrophilic luciferase from *Metridia longa*: Properties of a high-purity protein produced in insect cells. *Biochem Biophys Res Commun* **2017**, *483*, 772-778.
- 6 Tessler, M.; Gaffney, J.P.; Crawford, J.M.; Trautman, E.; Gujarati, N.A.; Alatalo, P.; Pieribone, V.A.; Gruber, D.F. Luciferin production and luciferase transcription in the bioluminescent copepod *Metridia lucens*, *Peer J* **2018**, *6*, e5506. [https://doi: 10.7717/peerj.5506](https://doi.org/10.7717/peerj.5506).
- 7 Markova, S.V.; Larionova, M.D.; Burakova, L.P.; Vysotski, E.S. The smallest natural high-active luciferase: cloning and characterization of novel 16.5-kDa luciferase from copepod *Metridia longa*. *Biochem Biophys Res Commun* **2015**, *457*, 77-82. [https://doi:10.1016/j.bbrc.2014.12.082](https://doi.org/10.1016/j.bbrc.2014.12.082)
- 8 Zhang, Y. I-TASSER server for protein 3D structure prediction. *BMC Bioinform* **2008**, *9*, 40. <https://doi.org/10.1186/1471-2105-9-40>
- 9 Roy, A.; Kucukural, A.; Zhang, Y. I-TASSER: A unified platform for automated protein structure and function prediction. *Nat Protoc* **2010**, *5*, 725–738. <https://doi.org/10.1038/nprot.2010.5>
- 10 Yang, J.; Yan, R.; Roy, A.; Xu, D.; Poisson, J.; Zhang, Y. The I-TASSER Suite: Protein structure and function prediction. *Nat Methods* **2015**, *12*, 7–8. <https://doi.org/10.1038/nmeth.3213>
